# Supplementary material for: Family-Wide Survey of miR169s and NF-YAs and Their Expression Profiles Response to Abiotic Stress in Maize Roots
Source: PubMed Central journal article supplement (PMC3954700; doi:10.1371/journal.pone.0091369), 2014-03-14
Supplement: pone.0091369.s001.pdf [file pone.0091369.s001.pdf]

Figure 1S. Pre-miR169 sequence alignment in maize

|             |                                                                                   |     |
|-------------|-----------------------------------------------------------------------------------|-----|
| zma-miR169a | ..TAGGCTCGGGACTATGGTGCAGCCACGATGACTTGC CGA....TCGAT.....GTGACGCCICT...            | 57  |
| zma-miR169b | ..TAGGCTCGGGACTACGGTGCAGCCACGATGACTTGC CGA....TCTATCGTCGATCAACGAGCGACGCCCTTGAT    | 73  |
| zma-miR169c | ..ATGAGGTAGAGAACGGGATGCAGCCACGATGACTTGC GGG....CTCCTGG....AACCTGGAGGCGTCTC....    | 64  |
| zma-miR169d | ..GCAATAGGGGCCACTCAGGCTAGCCACGGA..GACTGCTATGAACTT.CTCAATGGTCCACACATTAGGTCCTTTG    | 75  |
| zma-miR169e | ..GCAATAGGGGCCACTCAGGCTAGCCACGGA..GACTGCTATGAACTT.CTCAATGGTCCACACATTAGGTCCTTTG    | 75  |
| zma-miR169f | ..ACCAGAGCTGATTCTGTTACGTAGCCACGATGACTTGC CTAGGTATATATGCAT..GGGCTATGGCTACATGCCTGAG | 76  |
| zma-miR169g | .CAGAGCTAGCC.TGCCTCTGTTAGCCACGATGACTTGC CTACATGCTCTC.....GCTAGTTCCGGTTGTTGCAT     | 70  |
| zma-miR169h | .CAATAAGGGCC.TGCCTCTGTTAGCCACGATGACTTGC CTATGTCCTTT.....GTTTACAAAGGATCAGAATT      | 69  |
| zma-miR169i | ..GATGAGAGTGTAGCTCTGTTAGCCACGATGACTTGC CTGTGTGCTGGCCACGCTCCCTCATGCAAGGACCATCTC    | 78  |
| zma-miR169j | GCGATAAGAGT..CTGTCCAGATAGCCACGATGACTTGC CTGTG.GCTTCTTGGCTTGGCTTGGCTCGGGCAAAACCTT  | 77  |
| zma-miR169k | .CGATGAGAGCA.CTGTCTCTGTTAGCCACGATGACTTGC CTGTG.GCTC.....CATCAGTCGACAGGAGCGCT      | 68  |
| zma-miR169l | .....GTAGCCACGATGACTTGC CTGTG.GTTCCCT.....GTCGTTGCCATGCCAATGCCT                   | 51  |
| zma-miR169m | .....TTAGCCACGATGACTTGC CTATCTCCATTA.....TTTGTTCATCGC...AGG                       | 47  |
| zma-miR169n | .....TTAGCCACGATGACTTGC CTATCTCCACTG.....TTTGTTCATCGC...AGG                       | 48  |
| zma-miR169o | .....GTAGCCACGATGACTTGC CTATGTCAGGCC.....TCT.GTTGGCAGTTCCGTC                      | 50  |
| zma-miR169p | .....GTAGCCACGATGACTTGC GGG.CATTATATTCTTGGCCCGCCGCAAGTCATCTGGG                    | 58  |
| zma-miR169q | .....TTAGCCACGATGACTTGC CTATCTCCATTA.....TTTGTTCATCGC...AGG                       | 51  |
| zma-miR169r | .....GCAGCCACGATGACTTGC GGGTATTTT.GAGCATGCATGTTACAGGGGACCATATGCA                  | 59  |
| Consensus   | agcca g a tgcc                                                                    |     |
| zma-miR169a | ...TGATCTCG.....TCGTGTCAGATCGTCCGGATCATCGGCAAGT.TGTTCTTGGCTACACCGTGGCTCCTG        | 124 |
| zma-miR169b | GTC.TGATCTCGACATCTA.TCGTGTGTCAGACCATCATCATCTATCGGCAAGT.TGTTCTTGGCTACACCGTGGCTCCTG | 150 |
| zma-miR169c | .....AGCTTG.....CTGTGCTGTGGCTTAGAACTTAGTCGGCAAGTCTGTCTTGGCTACACCGTGGCTCCTT        | 129 |
| zma-miR169d | TAAACAAGGACATAGGCAAGTCATCCTTGGCTATCAGAGGTAGGCCCTTATT.....                         | 128 |
| zma-miR169e | TAAACAAGGACATAGGCAAGTCATCCTTGGCTATCAGAGGTAGGCCCTTATT.....                         | 128 |
| zma-miR169f | AGCCAGTCTCTTGTGAGCGCTGAGCATGTATAGTGTAGGCA.TGTCTTCCCTTGGCTACTCGGAGCGGCTCTAGTCA.... | 150 |
| zma-miR169g | GCA..TGCCACTATGCCAGTC..CTGCTG..GGTTTGTGGCGGCTCTCCTTGGCTAGCCTGAGTGGCTCTTGGCTG....  | 140 |
| zma-miR169h | GTG..GACCTTTGTGTT.....GGTTCTGATGAGCATCTCCTTGGCTAGCCTGAGTGGCCCTTATTG....           | 128 |
| zma-miR169i | GTGTCGACCGACGAGCGAGCGAGCGATCGATCGATGAGAGGATGACGAAGCTTGGGGTGTACGTTGGCTCTCACGGGCA   | 158 |
| zma-miR169j | GTGTCGACCGACGAGCGAGCGAGCGATCGATCGATGAGAGGATGACGAAGCTTGGGGTGTACGTTGGCTCTCACGGGCA   | 151 |
| zma-miR169k | G.....TTCTTCTGCTTGTG...GTTG.TCGATCGAGCGCATCTCCTTGGCTAGCCCGAGCGGCTCTCATCCA....     | 133 |
| zma-miR169l | GTACTGTTGATCTACGGGCAATCATCC.CTGTACCG.....                                         | 89  |
| zma-miR169m | A.....AGCCCTTCCGTGATG...GATGAAATGTGGATGATGGCATCCATTCTT.GGCTAAGT.....              | 101 |
| zma-miR169n | G....ACCACCTGATGATGG..GTGTACTGTGTGGATGATGGCAGCCCTTCTT.GGCTAAGC.....               | 104 |
| zma-miR169o | G....GCAGCCATGGCGACGG..TTGCACAAGGTGAGTTTTTGGCGCTGGATGATGCAATGTGGCTGCATCGGCAGGT    | 123 |
| zma-miR169p | GCT.ACGC.....                                                                     | 65  |
| zma-miR169q | G....ACCTCCCTCATGGTGT..GGATGGAATGTGGATGATGGCAGCCCTTCTT..GGCTAAGT.....             | 106 |
| zma-miR169r | ATC.TGTTTGGAAATTTT.GAGCCCATACCGTGGCTGCTGCTCTTCCGGCAAGT.TGTCTTGGCTACAT.....        | 126 |
| Consensus   |                                                                                   |     |
| zma-miR169a | CTCCTG.....                                                                       | 130 |
| zma-miR169b | CTCCTG.....                                                                       | 156 |
| zma-miR169c | CCTCT.....                                                                        | 134 |
| zma-miR169d | .....                                                                             | 128 |
| zma-miR169e | .....                                                                             | 128 |
| zma-miR169f | .....                                                                             | 150 |
| zma-miR169g | .....                                                                             | 140 |
| zma-miR169h | .....                                                                             | 128 |
| zma-miR169i | GTCTCCTTGGCTAGCCCTGACTCACTCTTACCG                                                 | 191 |
| zma-miR169j | .....                                                                             | 151 |
| zma-miR169k | .....                                                                             | 133 |
| zma-miR169l | .....                                                                             | 89  |
| zma-miR169m | .....                                                                             | 101 |
| zma-miR169n | .....                                                                             | 104 |
| zma-miR169o | CTTCTTGGCTAGCCA.....                                                              | 138 |
| zma-miR169p | .....                                                                             | 65  |
| zma-miR169q | .....                                                                             | 106 |
| zma-miR169r | .....                                                                             | 126 |
| Consensus   |                                                                                   |     |
